# Supplementary material
Source: ML conference proceedings conference paper supplement (https://openreview.net/forum?id=KzJD73GqDt)

# Clang – ackley

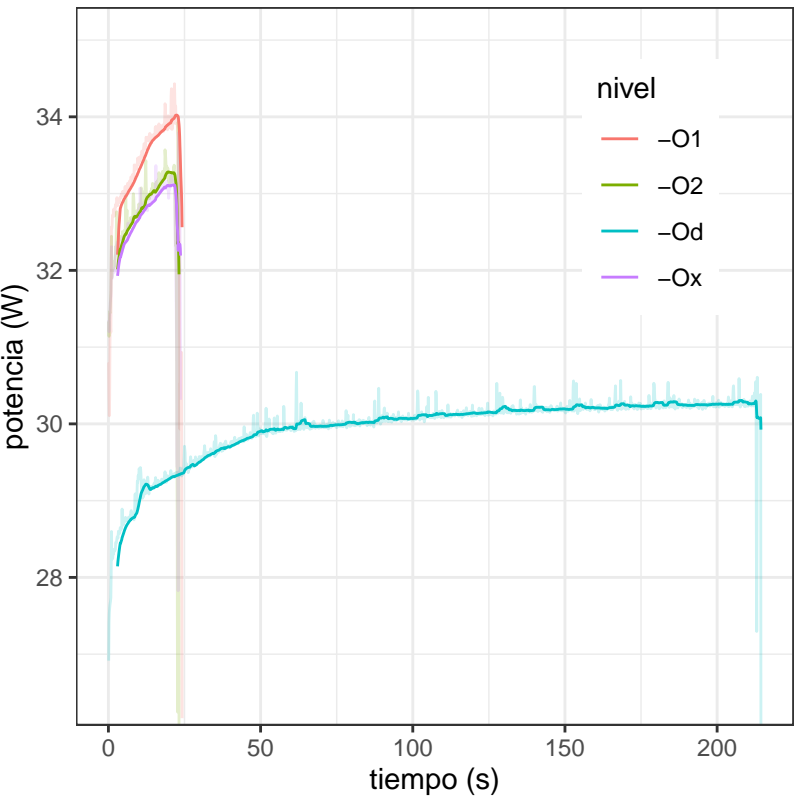

Supplement: supplementary_material [file fig-power-1.pdf › fig/fig-power-1.pdf]

# Clang – rastrigin

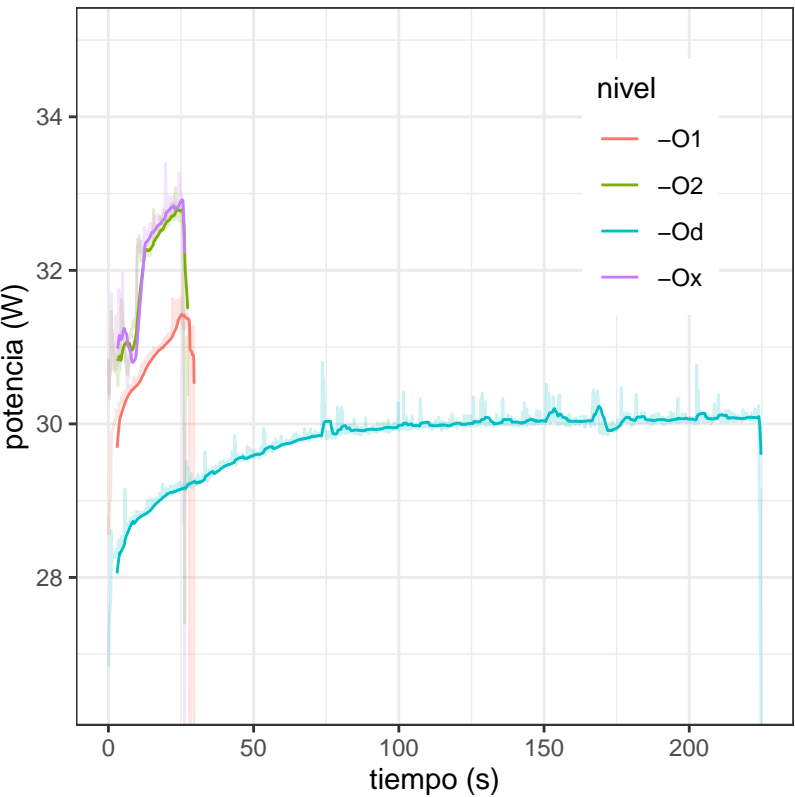

Supplement: supplementary_material [file fig-power-2.pdf › fig/fig-power-2.pdf]

# Clang – rosenbrock

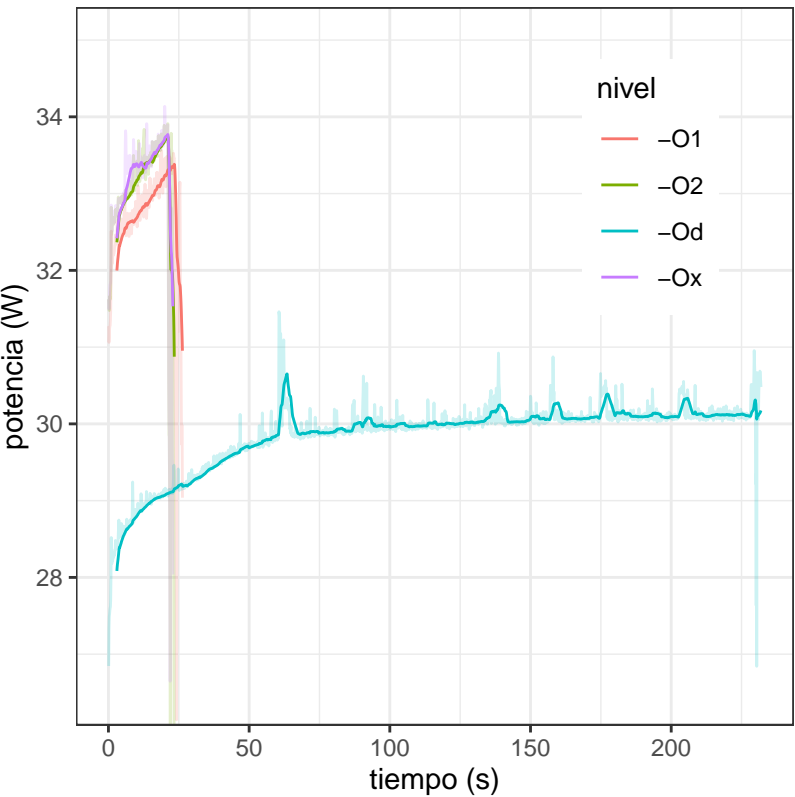

Supplement: supplementary_material [file fig-power-3.pdf › fig/fig-power-3.pdf]

# Visual C++ – ackley

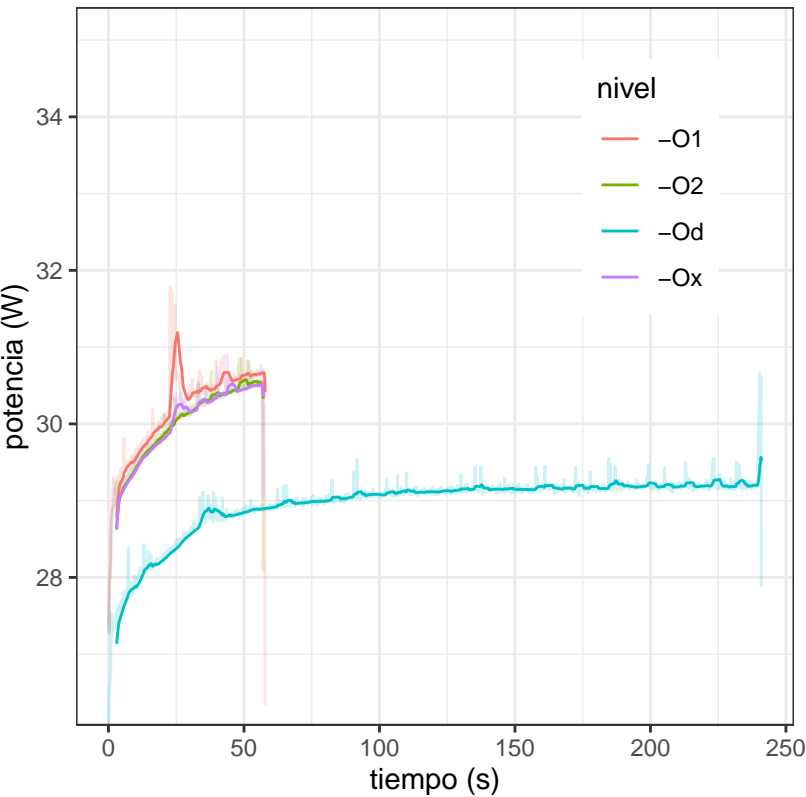

Supplement: supplementary_material [file fig-power-4.pdf › fig/fig-power-4.pdf]

# Visual C++ – rastrigin

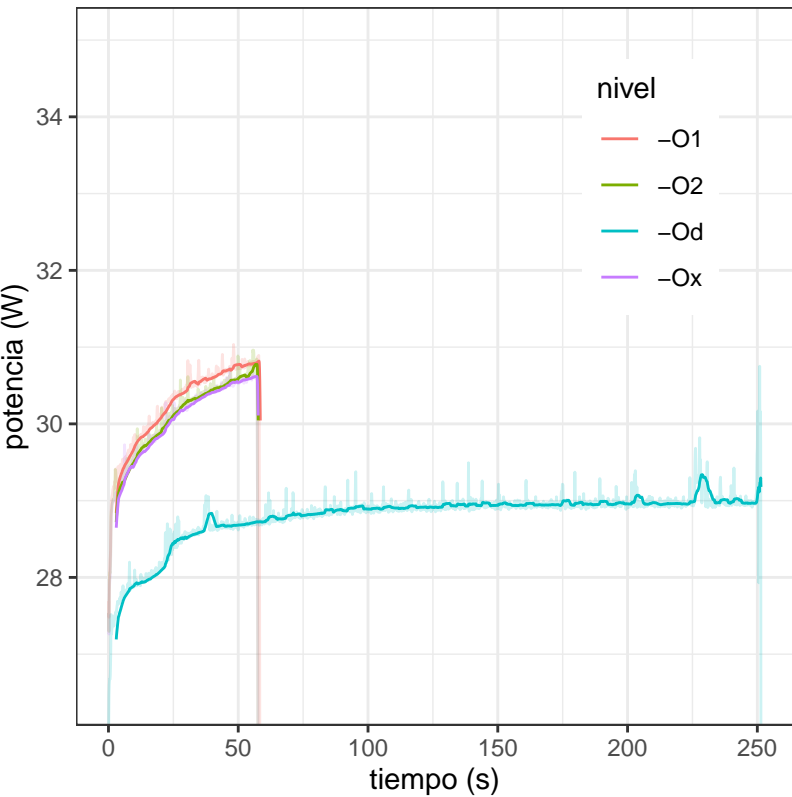

Supplement: supplementary_material [file fig-power-5.pdf › fig/fig-power-5.pdf]

# Visual C++ – rosenbrock

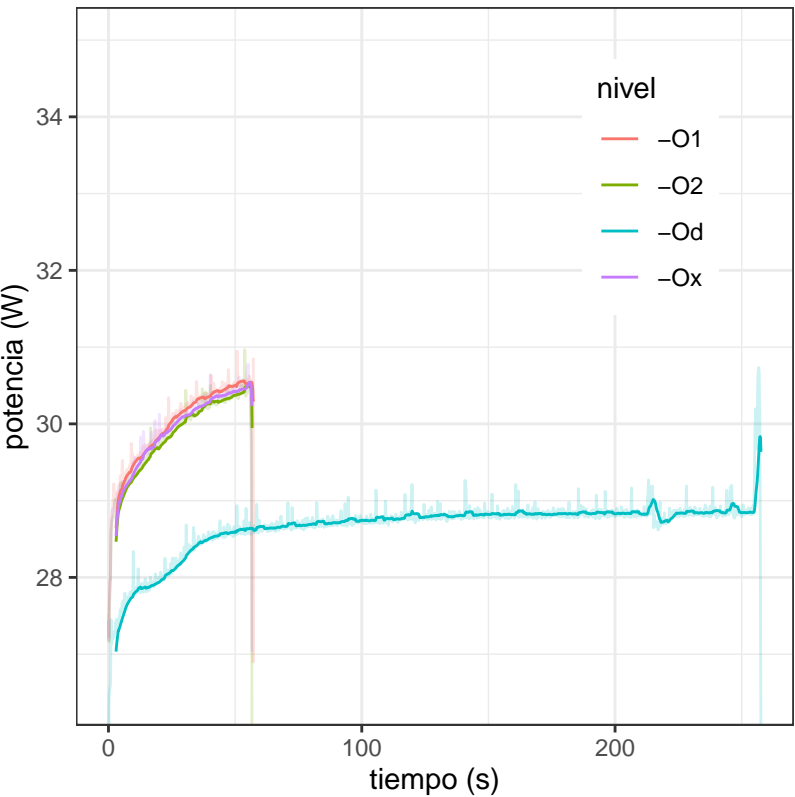

Supplement: supplementary_material [file fig-power-6.pdf › fig/fig-power-6.pdf]

# Clang

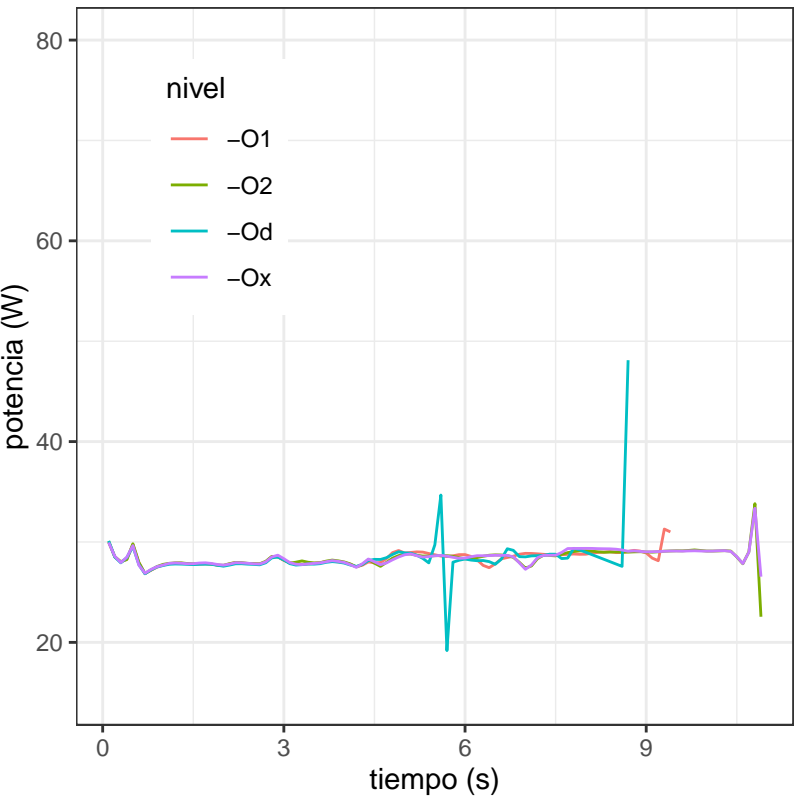

Supplement: supplementary_material [file fig-power-compiler-1.pdf › fig/fig-power-compiler-1.pdf]

# Visual C++

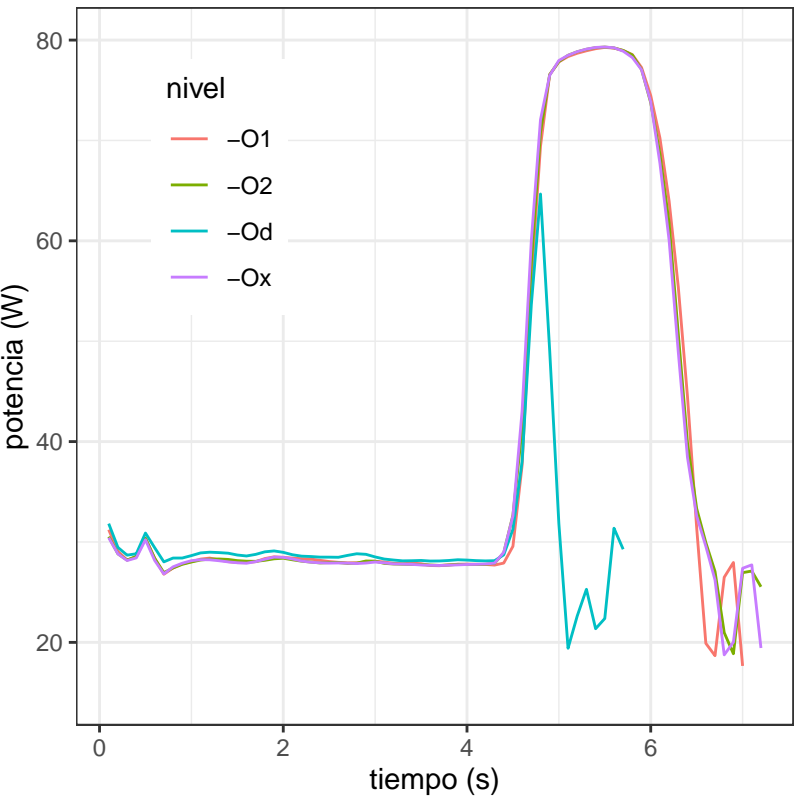

Supplement: supplementary_material [file fig-power-compiler-2.pdf › fig/fig-power-compiler-2.pdf]

# Clang - ackley

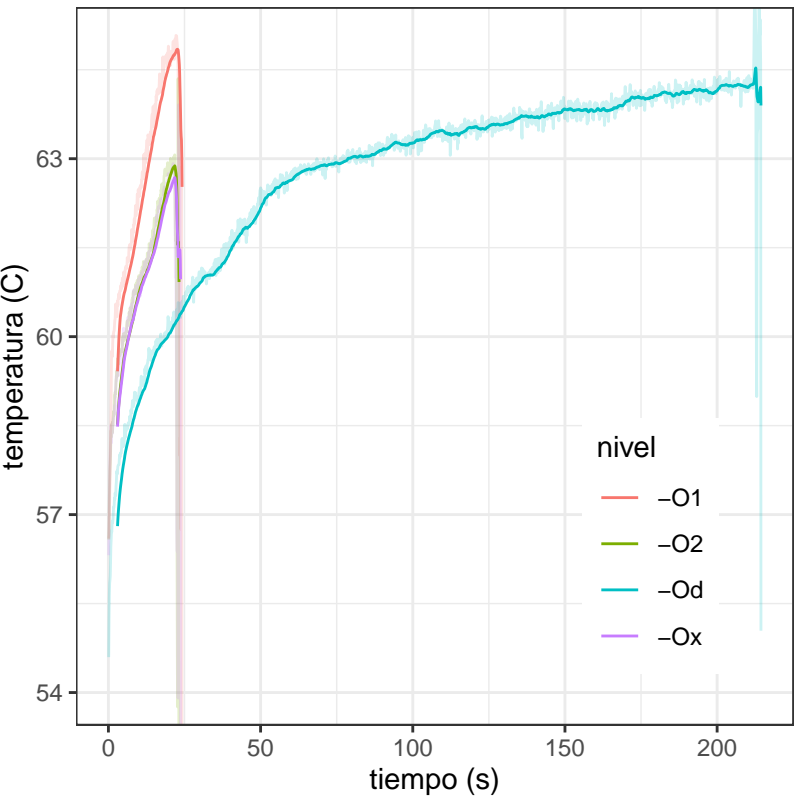

Supplement: supplementary_material [file fig-temperature-1.pdf › fig/fig-temperature-1.pdf]

# Clang – rastrigin

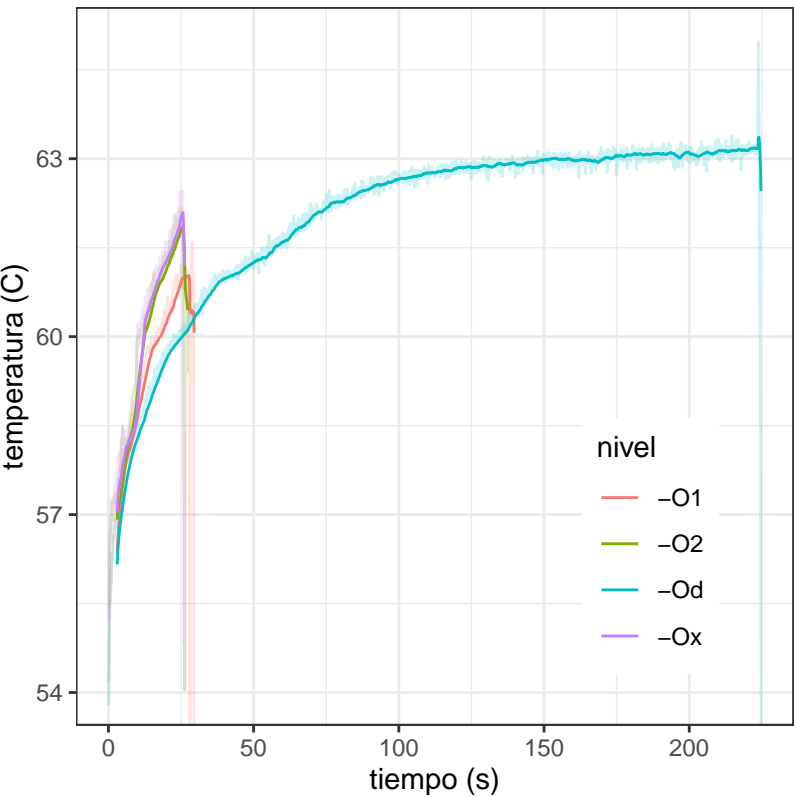

Supplement: supplementary_material [file fig-temperature-2.pdf › fig/fig-temperature-2.pdf]

# Clang – rosenbrock

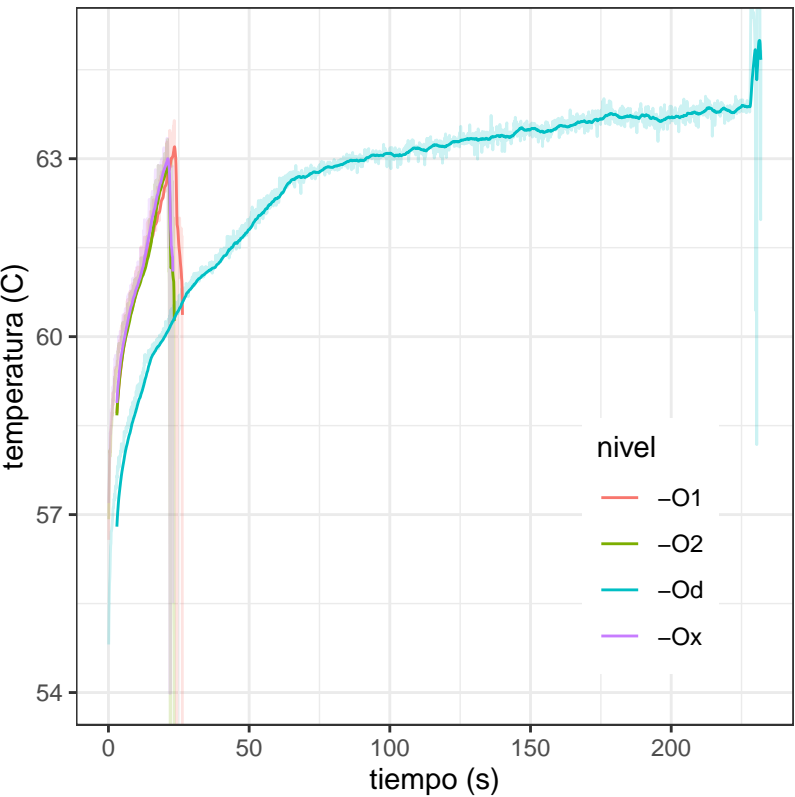

Supplement: supplementary_material [file fig-temperature-3.pdf › fig/fig-temperature-3.pdf]

# Visual C++ – ackley

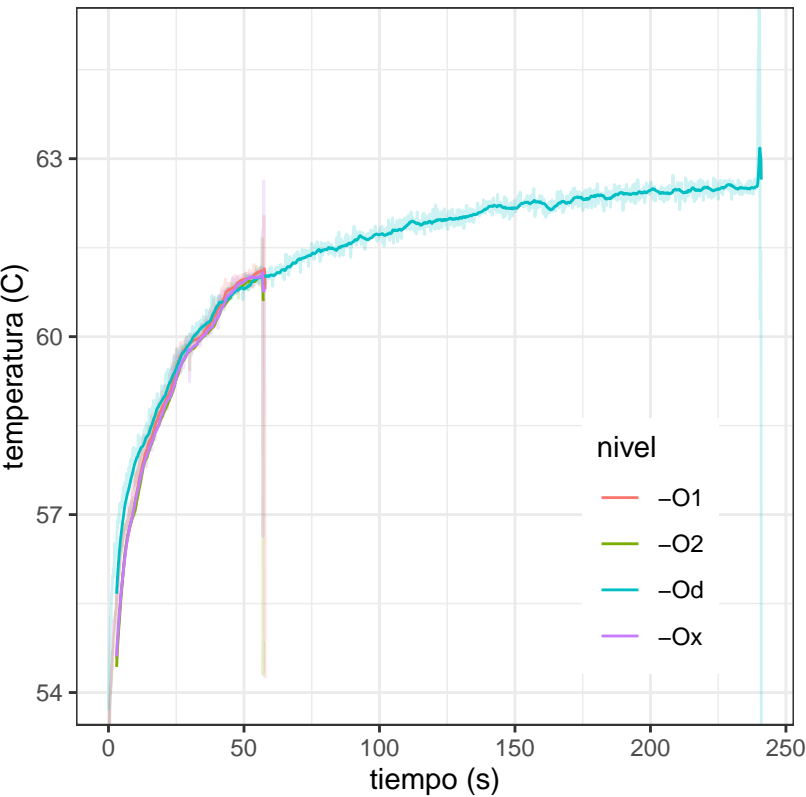

Supplement: supplementary_material [file fig-temperature-4.pdf › fig/fig-temperature-4.pdf]

# Visual C++ – rastrigin

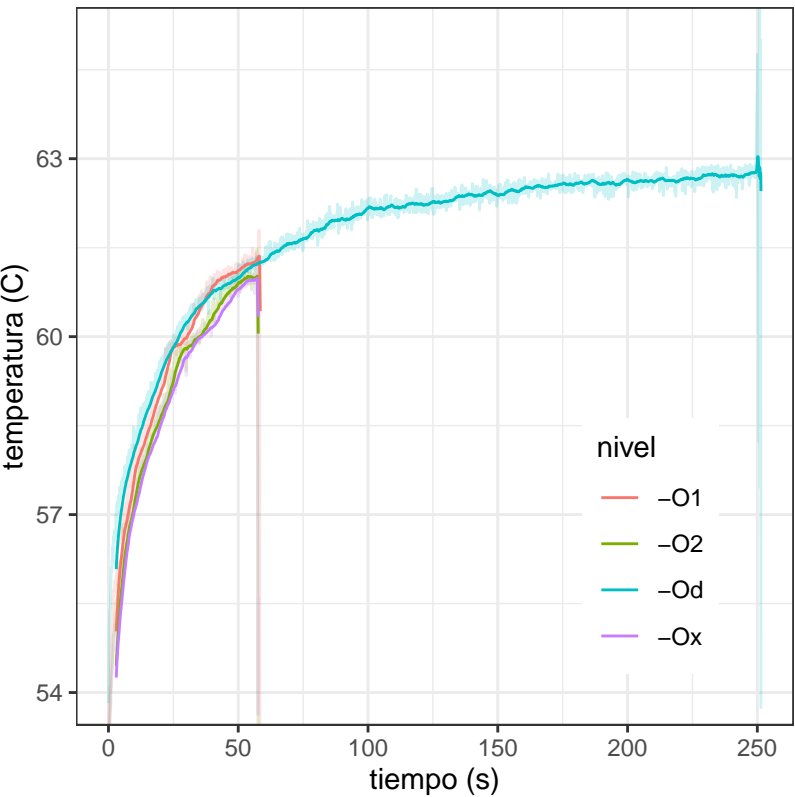

Supplement: supplementary_material [file fig-temperature-5.pdf › fig/fig-temperature-5.pdf]

# Visual C++ – rosenbrock

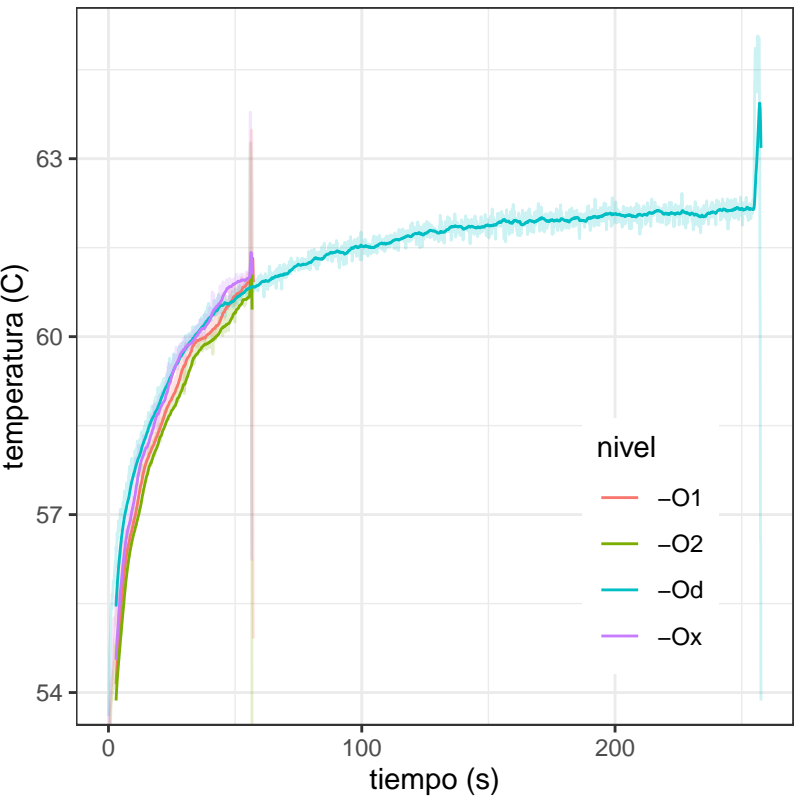

Supplement: supplementary_material [file fig-temperature-6.pdf › fig/fig-temperature-6.pdf]
